# Supplementary material for: Perception of Ticks and Tick-Borne Diseases Worldwide
Source: MDPI journal article supplement (doi:10.3390/pathogens12101258), 2023-10-19
Supplement: s1 [file s1]

**Supplementary Materials: Dataset S1.** USDA and NIH online free access information about TBD. **Dataset S2.** CDC online information on TBD surveillance. **Dataset S3.** Tick-borne pathogens identified in ticks from Central America.

**Dataset S1.** USDA and NIH online free access information about TBD.

U.S. Department of Agriculture (USDA). Animal and Plant Health Inspection Service. Vector-borne diseases. Last Modified: Jul 26, 2022.

<https://www.aphis.usda.gov/aphis/ourfocus/animalhealth/animal-disease-information/cattle-disease-information/cattle-vector-borne-diseases>

U.S. Department of Agriculture (USDA). National Institute of Food and Agriculture. May 5, 2022. Research tackling Lyme disease and other tick-borne diseases.

<https://www.nifa.usda.gov/about-nifa/blogs/research-tackling-lyme-disease-other-tick-borne-diseases>

National Institutes of Health (NIH). National Institute of Allergy and Infectious Diseases. October 10, 2019. Tick-borne diseases. <https://www.niaid.nih.gov/diseases-conditions/tick-borne-diseases>

National Institutes of Health (NIH). National Institute of Allergy and Infectious Diseases. October 18, 2017. Tick-borne Disease-Specific Research. <https://www.niaid.nih.gov/diseases-conditions/tick-borne-diseases-specific>

NIH tick-borne diseases strategic planning team. National Institutes of Health (NIH). October 9, 2019. NIH strategic plan for tick-borne disease research.

<https://www.niaid.nih.gov/sites/default/files/NIH-Strategic-Plan-Tick-borne-Disease-Research-2019.pdf>

National Institutes of Health (NIH). News in Health. June 2012. An Uptick in Ticks. Don't Let Ticks Make You Sick. <https://newsinhealth.nih.gov/2023/06/uptick-ticks>

National Institutes of Health (NIH). News in Health. May 2014. Tick Talk. Block tick bites and Lyme disease. <https://newsinhealth.nih.gov/2014/05/tick-talk>

**Dataset S2.** CDC online information on TBD surveillance.

[https://www.cdc.gov/ticks/data-summary/dashboard-data-files/Selected\\_Tick-borne\\_Diseases\\_United-States.csv](https://www.cdc.gov/ticks/data-summary/dashboard-data-files/Selected_Tick-borne_Diseases_United-States.csv)

Year,Count,Disease

2016,36429,Lyme disease

2016,4151,Anaplasmosis

2016,4269,Spotted Fever Rickettsiosis

2016,1910,Babesiosis

2016,1377,Ehrlichia chaffeensis ehrlichiosis

2016,230,Tularemia

2016,200,Undetermined ehrlichiosis/anaplasmosis

2016,22,Ehrlichia ewingii ehrlichiosis

2016,22,Powassan virus disease

2017,42743,Lyme disease

2017,5762,Anaplasmosis

2017,6248,Spotted Fever Rickettsiosis

2017,2368,Babesiosis

2017,1642,Ehrlichia chaffeensis ehrlichiosis

2017,239,Tularemia

2017,269,Undetermined ehrlichiosis/anaplasmosis

2017,45,Ehrlichia ewingii ehrlichiosis

2017,34,Powassan virus disease

2018,33666,Lyme disease

2018,4008,Anaplasmosis

2018,5544,Spotted Fever Rickettsiosis

2018,2160,Babesiosis

2018,1799,Ehrlichia chaffeensis ehrlichiosis

2018,229,Tularemia

2018,283,Undetermined ehrlichiosis/anaplasmosis

2018,33,Ehrlichia ewingii ehrlichiosis

2018,21,Powassan virus disease

2019,34945,Lyme disease

2019,5655,Anaplasmosis

2019,5207,Spotted Fever Rickettsiosis

2019,2420,Babesiosis

2019,2093,Ehrlichia chaffeensis ehrlichiosis

2019,274,Tularemia

2019,185,Undetermined ehrlichiosis/anaplasmosis

2019,43,Ehrlichia ewingii ehrlichiosis

2019,43,Powassan virus disease

[https://www.cdc.gov/ticks/data-summary/dashboard-data-files/total\\_reported\\_cases\\_1619.csv](https://www.cdc.gov/ticks/data-summary/dashboard-data-files/total_reported_cases_1619.csv)

Year,2016,2017,2018,2019

Reported Tick-borne Disease,Count,Count,Count,Count

Lyme disease,"36,429","42,743","33,666","34,945"

Anaplasmosis,"4,151","5,762","4,008","5,655"

Spotted Fever Rickettsiosis,"4,269","6,248","5,544","5,207"

Babesiosis,"1,910","2,368","2,160","2,420"

Ehrlichia chaffeensis ehrlichiosis,"1,377","1,642","1,799","2,093"

Tularemia,230,239,229,274

Undetermined ehrlichiosis/anaplasmosis,200,269,283,185

Ehrlichia ewingii ehrlichiosis,22,45,33,43  
Powassan virus disease,22,34,21,43  
Total,"48,610","59,350","47,743","50,865"

**Dataset S3.** Tick-borne pathogens identified in ticks from Central America.

| Country    | <i>Rickettsia</i> spp.                    | Arthropod species                                                                                                                                                                                                                        |
|------------|-------------------------------------------|------------------------------------------------------------------------------------------------------------------------------------------------------------------------------------------------------------------------------------------|
| Belize     | <i>Rickettsia amblyommatis</i>            | <i>Amblyomma pacae</i><br><i>Amblyomma cajennense</i> s.l.<br><i>Amblyomma ci. maculatum</i>                                                                                                                                             |
|            | <i>Rickettsia parkeri</i>                 | <i>Amblyomma maculatum</i>                                                                                                                                                                                                               |
|            | <i>Rickettsia</i> st. Atlantic Rainforest | <i>Amblyomma ovale</i>                                                                                                                                                                                                                   |
|            | <i>Rickettsia</i> sp.                     | <i>Ixodes affinis</i><br><i>Rhipicephalus sanguineus</i> s.l.                                                                                                                                                                            |
|            |                                           | <i>Amblyomma ovale</i>                                                                                                                                                                                                                   |
| Costa Rica | <i>Rickettsia amblyommatis</i>            | <i>Amblyomma geayi</i><br><i>Amblyomma longirostre</i><br><i>Amblyomma mixtum</i><br><i>Amblyomma ovale</i><br><i>Amblyomma cf. parvum</i><br><i>Amblyomma</i> spp.<br><i>Dermacentor nitens</i><br><i>Rhipicephalus sanguineus</i> s.l. |
|            | <i>Rickettsia bellii</i>                  | <i>Amblyomma geayi</i>                                                                                                                                                                                                                   |
|            | <i>Rickettsia rickettsii</i>              | <i>Amblyomma sabanerae</i><br><i>Amblyomma mixtum</i><br><i>Amblyomma varium</i><br><i>Haemaphysalis leporispalustris</i>                                                                                                                |
|            | <i>Rickettsia</i> sp. st. IbR/CRC         | <i>Ixodes ci. boliviensis</i>                                                                                                                                                                                                            |
|            | <i>Rickettsia</i> sp.                     | <i>Ixodes cf. minor</i><br><i>Amblyomma ovale</i><br><i>Rhipicephalus microplus</i><br><i>Dermacentor latius</i>                                                                                                                         |
|            | <i>Rickettsia rhipicephali</i>            | <i>Ornithodoros knoxjonesi</i>                                                                                                                                                                                                           |
|            | Ca. “ <i>Rickettsia nicoyana</i> ”        | <i>Amblyomma dissimile</i>                                                                                                                                                                                                               |
|            | <i>Rickettsia</i> sp. st. Colombianensi   | <i>Amblyomma geayi</i>                                                                                                                                                                                                                   |
|            | <i>Rickettsia</i> sp. ci. raoultii        | <i>Amblyomma mixtum</i><br><i>Amblyomma cf. parvum</i><br><i>Dermacentor nitens</i><br><i>Rhipicephalus sanguineus</i> s.l.                                                                                                              |
|            | <i>Rickettsia amblyommatis</i>            | <i>Amblyomma sabanerae</i><br><i>Amblyomma ovale</i>                                                                                                                                                                                     |
|            | <i>Rickettsia bellii</i>                  | <i>Amblyomma ovale</i>                                                                                                                                                                                                                   |
|            | <i>Rickettsia parkeri</i>                 | <i>Amblyomma dissimile</i><br><i>Amblyomma scutatum</i>                                                                                                                                                                                  |
|            | Ca. “ <i>R. Colomnianensis</i> ”          | <i>Amblyomma cajennense</i> s.l.                                                                                                                                                                                                         |
|            | <i>Rickettsia</i> sp.                     | <i>Amblyomma longirostre</i><br><i>Amblyomma mixtum</i>                                                                                                                                                                                  |
|            | <i>Rickettsia amblyommatis</i>            | <i>Amblyomma dissimile</i>                                                                                                                                                                                                               |
| Honduras   | <i>Rickettsia</i> st. Colombianensi       | <i>Amblyomma sculptum</i>                                                                                                                                                                                                                |
|            | <i>Rickettsia amblyommatis</i>            | <i>Amblyomma ovale</i><br><i>Amblyomma triste</i><br><i>Amblyomma maculatum</i><br><i>Dermacentor dissimilis</i><br><i>Rhipicephalus sanguineus</i> s.l.                                                                                 |
| Nicaragua  | <i>Rickettsia africae</i>                 | <i>Amblyomma auricularium</i>                                                                                                                                                                                                            |
|            | <i>Rickettsia</i> st. Aragoi              | <i>Amblyomma geayi</i><br><i>Amblyomma longirostre</i><br><i>Amblyomma mixtum</i><br><i>Amblyomma ovale</i><br><i>Amblyomma pacae</i><br><i>Amblyomma varium</i><br><i>Dermacentor nitens</i><br><i>Haemaphysalis juxtakochi</i>         |
|            | <i>Rickettsia</i> spp.                    |                                                                                                                                                                                                                                          |
|            |                                           |                                                                                                                                                                                                                                          |
|            |                                           |                                                                                                                                                                                                                                          |
| Panamá     | <i>Rickettsia amblyommatis</i>            |                                                                                                                                                                                                                                          |
|            |                                           |                                                                                                                                                                                                                                          |

|            | <i>Rickettsia bellii</i>                                                                  | <i>Rhipicephalus sanguineus</i> s.l.<br><i>Ctenocephalides felis</i><br><i>Amblyomma sabanerae</i><br><i>Amblyomma dissimile</i><br><i>Amblyomma rotundatum</i><br><i>Amblyomma mixtum</i> |
|------------|-------------------------------------------------------------------------------------------|--------------------------------------------------------------------------------------------------------------------------------------------------------------------------------------------|
|            | <i>Rickettsia rickettsii</i>                                                              | <i>Amblyomma mixtum</i><br><i>Rhipicephalus sanguineus</i> s.l.<br><i>Dermacentor nitens</i>                                                                                               |
|            | Ca. "R. Colomnianensis"                                                                   | <i>Amblyomma dissimile</i>                                                                                                                                                                 |
|            | <i>Rickettsia</i> sp.                                                                     | <i>Ixodes affinis</i>                                                                                                                                                                      |
|            | <i>Rickettsia</i> sp.                                                                     | <i>Ixodes</i> cf. <i>boliviensis</i>                                                                                                                                                       |
|            | <i>Rickettsia</i> sp.                                                                     | <i>Ixodes tapirus</i>                                                                                                                                                                      |
|            | <i>Rickettsia</i> sp. ci. <i>raoultii</i>                                                 | <i>Amblyomma geayi</i>                                                                                                                                                                     |
|            | <i>Rickettsia</i> sp. ci. <i>tamurae</i>                                                  | <i>Amblyomma dissimile</i>                                                                                                                                                                 |
| Country    | Anaplasmataceae                                                                           | Arthropod species                                                                                                                                                                          |
| Costa Rica | <i>Ehrlichia canis</i>                                                                    | <i>Rhipicephalus sanguineus</i> s.l.                                                                                                                                                       |
| Nicaragua  |                                                                                           |                                                                                                                                                                                            |
| Panamá     | <i>Anaplasma marginale</i><br><i>Anaplasma platys</i><br><i>Anaplasma phagocitophilum</i> | <i>Rhipicephalus microplus</i><br><i>Rhipicephalus sanguineus</i> s.l.<br><i>Ixodes tapirus</i><br><i>Rhipicephalus microplus</i>                                                          |
|            | <i>Ehrlichia canis</i><br><i>Ehrlichia</i> ci. <i>chaffeensis</i>                         | <i>Rhipicephalus sanguineus</i> s.l.<br><i>Amblyomma mixtum</i><br><i>Dermacentor nitens</i>                                                                                               |
| Country    | Borrelia                                                                                  | Arthropod species                                                                                                                                                                          |
| Panamá     | <i>Borrelia recurrentis</i> s.l.                                                          | <i>Ornithodoros rudis</i><br><i>Alecterobius talaje</i><br><i>Alecterobius puertoricensis</i>                                                                                              |
|            | <i>Borrelia puertoricensis</i><br><i>Borrelia burgdorferi</i> group                       | <i>Ixodes</i> cf. <i>boliviensis</i>                                                                                                                                                       |
| Country    | Hemoparasite                                                                              | Arthropod species                                                                                                                                                                          |
| Panama     | <i>Hepatozoon</i> spp.<br><i>Babesia odocoilei</i>                                        | <i>Ixodes</i> cf. <i>boliviensis</i><br><i>Ixodes</i> cf. <i>boliviensis</i>                                                                                                               |

### Selected references in support to Dataset S3

Ábrego-Sánchez, L., Jiménez-Rocha, A.E., Montenegro, V.M., Dolz, G. Detección de agentes zoonóticos (*Ehrlichia* spp., *Rickettsia* spp., *Anaplasma platys* y *Borrelia burgdorferii* s.l.) en garrapatas recolectadas de perros en Costa Rica (Detection of zoonotic agents in ticks collected from dogs in Costa Rica). Fourth Latin American Congress on Rickettsial Diseases, San José, Costa Rica. *Acta Méd. Costarric.* 2013;55:88.

Bermúdez CSE, Troyo A. A review of the genus *Rickettsia* in Central America. *Res Rep Trop Med.* 2018;9:103-112. doi:10.2147/RRTM.S160951

Bermúdez C SE, Félix ML, Domínguez A L, Kadoch N, Muñoz-Leal S, Venzal JM. Molecular screening for tick-borne bacteria and hematozoa in *Ixodes* cf. *boliviensis* and *Ixodes tapirus* (Ixodida: Ixodidae) from western highlands of Panama. *Curr Res Parasitol Vector Borne Dis.* 2021;1:100034. doi:10.1016/j.crpvbd.2021.100034

Bermúdez S, Martínez-Mandiche J, Domínguez L, et al. Diversity of *Rickettsia* in ticks collected from wild animals in Panama. *Ticks Tick Borne Dis.* 2021;12(4):101723. doi:10.1016/j.ttbdis.2021.101723

Dunn LH, Clark HC. Notes on relapsing fever in Panama with special reference to animal hosts. *Am. J. Trop. Med. Hyg.* 1933;13:201-209.

Bermúdez SE, Armstrong BA, Domínguez L, et al. Isolation and genetic characterization of a relapsing fever spirochete isolated from *Ornithodoros puertoricensis* collected in central Panama. *PLoS Negl Trop Dis.* 2021;15(8):e0009642. doi:10.1371/journal.pntd.0009642

Orgzewalska M, Bermúdez S. Detección molecular de *Rickettsia bellii* en *Amblyomma rotundatum* Koch 1884 (Ixodida: Ixodidae) en Panamá. *Tecnociencia* 2019;21(1):41-56.

Romero L, Costa FB, Labruna MB. Ticks and tick-borne *Rickettsia* in El Salvador. *Exp Appl Acarol.* 2021;83(4):545-554. doi:10.1007/s10493-021-00610-w

Romero LE, Binder LC, Marcili A, Labruna MB. Ticks and tick-borne rickettsiae from dogs in El Salvador, with report of the human pathogen *Rickettsia parkeri*. *Ticks Tick Borne Dis.* 2023;14(5):102206. doi:10.1016/j.ttbdis.2023.102206

Springer A, Montenegro VM, Schicht S, et al. Detection of *Rickettsia monacensis* and *Rickettsia amblyommatis* in ticks collected from dogs in Costa Rica and Nicaragua. *Ticks Tick Borne Dis.* 2018;9(6):1565-1572. doi:10.1016/j.ttbdis.2018.08.002

**Dataset S4.** Distribution of ticks and tick-borne pathogens worldwide.

| Country                  | Most recorded Tick specie                                                                                                                                                                                                                                                                                                                                                                                                 | Pathogens                                                                                                                                                                                                                                                                                                                                                                                                                                                                                                                                                                                                                                                                                                                                                                                  |
|--------------------------|---------------------------------------------------------------------------------------------------------------------------------------------------------------------------------------------------------------------------------------------------------------------------------------------------------------------------------------------------------------------------------------------------------------------------|--------------------------------------------------------------------------------------------------------------------------------------------------------------------------------------------------------------------------------------------------------------------------------------------------------------------------------------------------------------------------------------------------------------------------------------------------------------------------------------------------------------------------------------------------------------------------------------------------------------------------------------------------------------------------------------------------------------------------------------------------------------------------------------------|
| United States of America | Human:<br><i>Ixodes scapularis</i><br><i>Amblyomma americanum</i><br><i>Dermacentor variabilis</i><br><i>Ixodes pacificus</i><br><i>Dermacentor andersoni</i><br><i>Otobius megnini</i><br><i>Ornithodoros coriaceus</i>                                                                                                                                                                                                  | <i>Borrelia burgdorferi</i> sensu stricto and <i>Borrelia mayonii</i> (Lyme disease)<br><i>Borrelia miyamotoi</i> (hard tick-borne relapsing fever)<br><i>Anaplasma phagocytophilum</i> (human anaplasmosis)<br><i>Ehrlichia muris eauclairensis</i> , <i>Ehrlichia chaffeensis</i> ,<br><i>Ehrlichia ewingii</i> (ehrlichiosis)<br><i>Babesia microti</i> (babesiosis)<br><i>Babesia duncani</i><br><i>Francisella tularensis</i> (Tularemia)<br><i>Borrelia hermsii</i> , <i>B. turicata</i> , <i>B. parkeri</i><br><i>Rickettsia rickettsii</i> (Rocky Mountain spotted fever)<br><i>Rickettsia philipii</i> (Pacific Coast tick fever)<br><i>Rickettsia parkeri</i> (other spotted fever)<br>Powassan virus (Powassan encephalitis)<br>Colorado tick fever virus (Colorado tick fever) |
|                          | Other:<br><i>Ixodes cookei</i> , <i>Dermacentor occidentalis</i> , <i>Rhipicephalus sanguineus</i> sensu lato, <i>Dermacentor albipictus</i> , and <i>Amblyomma maculatum</i><br><br>Cattle:<br><i>Rhipicephalus annulatus</i><br><i>Rhipicephalus microplus</i><br><i>Haemaphysalis longicornis</i> (Asian longhorned ticks)<br><i>Ambylomma hebraeum</i> and <i>Amblyomma variegatum</i> (Bont and Tropical Bont Ticks) | Bourbon virus<br>Heartland virus<br><br>Cattle:<br>Bovine babesiosis and anaplasmosis<br><i>Theileria orientalis Ikeda</i><br><i>Ehrlichia ruminantium</i><br>Nairobi sheepdisease                                                                                                                                                                                                                                                                                                                                                                                                                                                                                                                                                                                                         |
| Alasca                   | Native species<br><i>Haemaphysalis leporispalustris</i><br><i>Ixodes angustus</i><br><i>Ixodes auritulus</i><br><i>Ixodes howelli</i><br><i>Ixodes signatus</i>                                                                                                                                                                                                                                                           |                                                                                                                                                                                                                                                                                                                                                                                                                                                                                                                                                                                                                                                                                                                                                                                            |

|                        |                                                                                                                                                                                                                                                                                               |                                                                                                                                                                                                                                                                                                                                                                                                         |
|------------------------|-----------------------------------------------------------------------------------------------------------------------------------------------------------------------------------------------------------------------------------------------------------------------------------------------|---------------------------------------------------------------------------------------------------------------------------------------------------------------------------------------------------------------------------------------------------------------------------------------------------------------------------------------------------------------------------------------------------------|
|                        | <i>Ixodes uriae</i>                                                                                                                                                                                                                                                                           |                                                                                                                                                                                                                                                                                                                                                                                                         |
|                        | <b>Non-native species</b><br><i>A. americanum</i><br><i>Dermacentor andersoni</i><br><i>D. occidentalis</i><br><i>Dermacentor variabilis</i><br><i>Ixodes pacificus</i><br><i>Ixodes ricinus</i><br><i>Ixodes scapularis</i><br><i>Ixodes texanus</i><br><i>Rhipicephalus sanguineus</i> s.l. |                                                                                                                                                                                                                                                                                                                                                                                                         |
| <b>Mexico</b>          | <b>Most common:</b><br><i>Rhipicephalus microplus</i> , <i>Rhipicephalus sanguineus</i><br><br><b>Other:</b><br><i>Amblyomma</i> spp., <i>Dermacentor</i> spp., <i>Ixodes</i> spp., <i>Otobius megnini</i>                                                                                    | <b>Human:</b><br><i>Rickettsia rickettsia</i> (Rickettsiosis)<br><i>B. burgdorferi</i><br><i>B. microti</i><br><i>A. phagocytophilum</i><br><br><b>Cattle:</b><br>Babesiosis and Anaplasmosis<br><br><b>Horses:</b><br>Equine babesiosis and Theileriosis<br><br><b>Dogs:</b><br><i>Canine babesiosis (B. vogeli)</i><br><i>Ehrlichia canis</i><br><i>Anaplasma platys</i><br><i>A. phagocytophilum</i> |
| <b>Central America</b> | <i>Amblyomma mixtum</i><br><i>Amblyomma ovale</i><br><i>Dermacentor nitens</i>                                                                                                                                                                                                                | Rickettsiosis ( <i>Rickettsia rickettsii</i> )<br><br>Others:                                                                                                                                                                                                                                                                                                                                           |



|                   |                                                                                                                                                                                                                                                                                                                                                                                                                                                                                                                                                                                                                         |                                                                                                                                                                                                                                                                                                                                                                                                                                                                                                                                                                                     |
|-------------------|-------------------------------------------------------------------------------------------------------------------------------------------------------------------------------------------------------------------------------------------------------------------------------------------------------------------------------------------------------------------------------------------------------------------------------------------------------------------------------------------------------------------------------------------------------------------------------------------------------------------------|-------------------------------------------------------------------------------------------------------------------------------------------------------------------------------------------------------------------------------------------------------------------------------------------------------------------------------------------------------------------------------------------------------------------------------------------------------------------------------------------------------------------------------------------------------------------------------------|
|                   | <i>Rhipicephalus microplus</i><br><i>Rhipicephalus sanguineus</i> s.l.<br><i>Alectorobius puertoricensis</i><br><i>Alectorobius talaje</i>                                                                                                                                                                                                                                                                                                                                                                                                                                                                              | Ehrlichiosis ( <i>E. canis</i> , <i>E. cf. chaffeensis</i> )<br>Anaplasmosis ( <i>A. marginale</i> , <i>A. phagocitophilum</i> , <i>A. platys</i> )<br>Relapsing fever<br>Babesiosis ( <i>B. odocoilei</i> , <i>B. vogeli</i> )<br><i>Borrelia</i> ( <i>B. puertoricensis</i> , <i>Borrelia burgdorferi</i> group)<br>Hepatozoon ( <i>H. canis</i> , <i>Hepatozoon</i> spp)                                                                                                                                                                                                         |
| <b>Guatemala</b>  | <i>Ornithodoros talaje</i><br><i>Amblyomma sabanerae</i>                                                                                                                                                                                                                                                                                                                                                                                                                                                                                                                                                                |                                                                                                                                                                                                                                                                                                                                                                                                                                                                                                                                                                                     |
| <b>Panamá</b>     | <i>Amblyomma auricularium</i><br><i>Amblyomma geayi</i><br><i>Amblyomma longirostre</i><br><i>Amblyomma mixtum</i><br><i>Amblyomma ovale</i><br><i>Amblyomma paca</i><br><i>Amblyomma varium</i><br><i>Amblyomma sabanerae</i><br><i>Amblyomma dissimile</i><br><i>Amblyomma rotundatum</i><br><i>Dermacentor nitens</i><br><i>Haemaphysalis juxtakochi</i><br><i>Rhipicephalus sanguineus</i> s.l.<br><i>Ctenocephalides felis</i><br><i>Ixodes affinis</i><br><i>Ixodes cf. boliviensis</i><br><i>Ixodes tapirus</i><br><i>Ornithodoros rudis</i><br><i>Alecterobius talaje</i><br><i>Alecterobius puertoricensis</i> | <i>Rickettsia amblyommatis</i><br><i>Rickettsia bellii</i><br><i>Rickettsia rickettsii</i><br>Ca. “ <i>R. Colomnianensis</i> ”<br><i>Rickettsia</i> sp.<br><i>Rickettsia</i> sp. ci. <i>raoultii</i><br><i>Rickettsia</i> sp. ci. <i>Tamurae</i><br><i>Anaplasma marginale</i><br><i>Anaplasma platys</i><br><i>Anaplasma phagocitophilum</i><br><i>Ehrlichia canis</i><br><i>Ehrlichia</i> ci. <i>chaffeensis</i><br><i>Borrelia recurrentis</i> s.l.<br><i>Borrelia puertoricensis</i><br><i>Borrelia burgdorferi</i> group<br><i>Hepatozoon</i> spp.<br><i>Babesia odocoilei</i> |
| <b>Costa Rica</b> | <i>Amblyomma geayi</i>                                                                                                                                                                                                                                                                                                                                                                                                                                                                                                                                                                                                  | <i>Rickettsia amblyommatis</i>                                                                                                                                                                                                                                                                                                                                                                                                                                                                                                                                                      |

|                    |                                                                                                                                                                                                                                                                                                                                                                                                                                                                                                            |                                                                                                                                                                                                                                                                                                         |
|--------------------|------------------------------------------------------------------------------------------------------------------------------------------------------------------------------------------------------------------------------------------------------------------------------------------------------------------------------------------------------------------------------------------------------------------------------------------------------------------------------------------------------------|---------------------------------------------------------------------------------------------------------------------------------------------------------------------------------------------------------------------------------------------------------------------------------------------------------|
|                    | <i>Amblyomma longirostre</i><br><i>Amblyomma mixtum</i><br><i>Amblyomma ovale</i><br><i>Amblyomma cf. parvum</i><br><i>Amblyomma spp.</i><br><i>Amblyomma dissimile</i><br><i>Amblyomma sabanerae</i><br><i>Amblyomma varium</i><br><i>Dermacentor nitens</i><br><i>Dermacentor latus</i><br><i>Rhipicephalus sanguineus s.l.</i><br><i>Rhipicephalus microplus</i><br><i>Haemaphysalis leporispalustris</i><br><i>Ixodes ci. boliviensis</i><br><i>Ixodes cf. minor</i><br><i>Ornithodoros knoxjonesi</i> | <i>Rickettsia bellii</i><br><i>Rickettsia rickettsii</i><br><i>Rickettsia sp. st. IbR/CRC</i><br><i>Rickettsia sp.</i><br><i>Rickettsia rhipicephali</i><br><i>Ca. "Rickettsia nicoyana"</i><br><i>Rickettsia sp. st. Colombianensi</i><br><i>Rickettsia sp. ci. raoultii</i><br><i>Ehrlichia canis</i> |
| <b>Belize</b>      | <i>Amblyomma pacae</i><br><i>Amblyomma cajennense s.l.</i><br><i>Amblyomma ci. maculatum</i><br><i>Amblyomma maculatum</i><br><i>Amblyomma ovale</i><br><i>Ixodes affinis</i><br><i>Rhipicephalus sanguineus s.l.</i>                                                                                                                                                                                                                                                                                      | <i>Rickettsia amblyommatis</i><br><i>Rickettsia parkeri</i><br><i>Rickettsia st. Atlantic Rainforest</i><br><i>Rickettsia sp.</i>                                                                                                                                                                       |
| <b>El Salvador</b> | <i>Amblyomma mixtum</i><br><i>Amblyomma cf. parvum</i><br><i>Dermacentor nitens</i><br><i>Rhipicephalus sanguineus s.l.</i><br><i>Amblyomma sabanerae</i><br><i>Amblyomma ovale</i><br><i>Amblyomma dissimile</i><br><i>Amblyomma scutatum</i><br><i>Amblyomma cajennense s.l.</i>                                                                                                                                                                                                                         | <i>Rickettsia amblyommatis</i><br><i>Rickettsia bellii</i><br><i>Rickettsia parkeri</i><br><i>Ca. "R. Colomnianensis"</i><br><i>Rickettsia sp.</i>                                                                                                                                                      |

|                 |                                                                                                                                                                                                                                                                                                                                                                                                                                                                                                           |                                                                                                                                                                                                                                                                                                                                                                                                                                                                                                                                                                                                                                                                                                                                                                                                        |
|-----------------|-----------------------------------------------------------------------------------------------------------------------------------------------------------------------------------------------------------------------------------------------------------------------------------------------------------------------------------------------------------------------------------------------------------------------------------------------------------------------------------------------------------|--------------------------------------------------------------------------------------------------------------------------------------------------------------------------------------------------------------------------------------------------------------------------------------------------------------------------------------------------------------------------------------------------------------------------------------------------------------------------------------------------------------------------------------------------------------------------------------------------------------------------------------------------------------------------------------------------------------------------------------------------------------------------------------------------------|
| <b>Honduras</b> | <i>Amblyomma longirostre</i><br><i>Amblyomma mixtum</i><br><i>Amblyomma dissimile</i>                                                                                                                                                                                                                                                                                                                                                                                                                     | <i>Rickettsia amblyommatis</i><br><i>Rickettsia st. Colombianensi</i>                                                                                                                                                                                                                                                                                                                                                                                                                                                                                                                                                                                                                                                                                                                                  |
| <b>Brazil</b>   | <p>Human:<br/> <i>Amblyomma sculptum</i> larvae and nymphs<br/> <i>Amblyomma aureolatum</i><br/> <i>Ornithodoros</i> spp.</p> <p>Cattle:<br/> <i>Rhipicephalus microplus</i></p> <p>Horse:<br/> <i>Amblyomma sculptum</i> and <i>Dermacentor nitens</i></p> <p>Dogs:<br/> <i>Rhipicephalus sanguineus</i> complex (<i>Rhipicephalus linnaei</i>)<br/> <i>Amblyomma aureolatum</i></p> <p>Wild carnivores:<br/> <i>Amblyomma aureolatum</i><br/> <i>Amblyomma ovale</i><br/> <i>Amblyomma tigrinum</i></p> | <p>Human:<br/> <i>Rickettsia rickettsii</i> (Brazilian Spotted-Fever)<br/> <i>Rickettsia parkeri</i> strain Atlantic rainforest<br/> <i>Borrelia</i> spp.</p> <p>Cattle:<br/> <i>Babesia</i> spp. and <i>Anaplasma marginale</i> (Bovine parasitic sadness)</p> <p>Horses:<br/> <i>Babesia caballi</i> and <i>Theileria equi</i> (Equine Piroplasmosis)</p> <p>Dogs:<br/> <i>Ehrlichia canis</i> (canine monocytic ehrlichiosis)<br/> <i>Babesia vogeli</i> (canine piroplasmosis)<br/> <i>Rickettsia rickettsii</i><br/> <i>Rangelia vitalii</i> (canine rangeliiosis)<br/> Hepatozoidae species (e.g., <i>Hepatozoon canis</i>)</p> <p>Wild carnivores:<br/> <i>Rickettsia rickettsii</i><br/> <i>Rickettsia parkeri</i> Atlantic rainforest strain<br/> <i>Rickettsia parkeri</i> sensu stricto</p> |
| <b>Europe</b>   | <i>Ixodes ricinus</i><br><i>Haemaphysalis punctata</i><br><i>Rhipicephalus</i> spp.<br><i>Hyalomma marginatum</i><br><i>Dermacentor</i> spp.                                                                                                                                                                                                                                                                                                                                                              | Ruminants and carnivores:<br><i>Babesia</i> spp.<br><i>Theileria</i> spp.<br><i>Anaplasma ovis</i><br><i>Anaplasma phagocytophilum</i>                                                                                                                                                                                                                                                                                                                                                                                                                                                                                                                                                                                                                                                                 |

|                |                                                                                                                                                                                            |                                                                                                                                                                                                                                                             |
|----------------|--------------------------------------------------------------------------------------------------------------------------------------------------------------------------------------------|-------------------------------------------------------------------------------------------------------------------------------------------------------------------------------------------------------------------------------------------------------------|
|                |                                                                                                                                                                                            | <i>Borrelia</i> spp.<br><i>Ehrlichia</i> spp.<br><i>Neoehrlichia</i><br>Tick-borne encephalitis virus                                                                                                                                                       |
| <b>Egypt</b>   | <i>Hyalomma</i> sp.<br><i>Rhipicephalus</i> sp.                                                                                                                                            | Humans:<br>Anaplasmosis<br>Borreliosis<br>Coxiella burnetii (Q fever)<br>Tick-borne rickettsiosis<br>Babesiosis<br>Alkhurma hemorrhagic fever<br>Crimean-Congo Hemorrhagic fever<br><br>Livestock:<br>Anaplasmosis<br>Babesiosis<br>Theileriosis<br>Q fever |
| <b>Uganda</b>  | Human:<br><i>Hyalomma</i><br><br>Cattle:<br><i>Rhipicephalus appendiculatus</i><br><i>Rhipicephalus decoloratus</i><br><i>Amblyomma variegatum</i><br><i>Rhipicephalus evertsi evertsi</i> | Human:<br>Crimean-Congo Hemorrhagic fever virus<br><br>Cattle:<br><i>Theileria parva</i><br><i>Babesia bovis</i><br><i>B. bigemina</i><br><i>Anaplasma marginale</i><br><i>Ehrlichia ruminantium</i>                                                        |
| <b>Nigeria</b> | <i>Boophilus</i> sp.<br><i>Amblyomma</i> sp.<br><i>Rhipicephalus</i> sp.<br><i>Haemophysalis</i> sp.<br><i>Aponomma</i> sp.                                                                | Babesiosis<br>Anaplasmosis<br>Theileriosis<br>Ehrlichiosis                                                                                                                                                                                                  |

|                  |                                                                                                                                                                                                                                                                                                                                   |                                                                                                                                                                                                                                                                                                                                                                                                                                                                                       |
|------------------|-----------------------------------------------------------------------------------------------------------------------------------------------------------------------------------------------------------------------------------------------------------------------------------------------------------------------------------|---------------------------------------------------------------------------------------------------------------------------------------------------------------------------------------------------------------------------------------------------------------------------------------------------------------------------------------------------------------------------------------------------------------------------------------------------------------------------------------|
| <b>India</b>     | <i>Hyalomma</i> sp.                                                                                                                                                                                                                                                                                                               |                                                                                                                                                                                                                                                                                                                                                                                                                                                                                       |
|                  | <p>Humans:</p> <p><i>Amblyomma integrum</i></p> <p><i>Haemaphysalis spinigera</i></p> <p><i>Dermacentor auratus</i></p> <p><i>Hyalomma isaaci</i></p> <p><i>Rhipicephalus haemaphysaloides</i></p> <p><i>Rhipicephalus sanguineus</i> s.l.</p> <p><i>Otobius megnini</i></p> <p>Cattle:</p> <p><i>Rhipicephalus microplus</i></p> | <p>Human:</p> <p>Kyasanur forest disease virus</p> <p>Crimean-Congo Hemorrhagic fever virus</p> <p>Ganjam virus</p> <p>Bhanja virus</p> <p><i>Borrelia burgdorferi</i> and <i>B. mayonii</i> (Lyme disease)</p> <p>Coxiella burnetii (Q fever)</p> <p><i>Rickettsia conorii</i> and <i>R. rickettsii</i></p> <p><i>Babesia microti</i> (Babesiosis)</p> <p>Animals:</p> <p>Theileriosis</p> <p>Babesiosis</p> <p>Anaplasmosis</p> <p>Ehrlichiosis</p> <p>Lumpy skin disease virus</p> |
| <b>Nepal</b>     | <p>Cattle:</p> <p><i>Rhipicephalus microplus</i></p> <p><i>Haemophysalis</i> spp.</p> <p><i>Ixodes</i> spp.</p> <p><i>Amblyomma</i> spp.</p> <p>Goats:</p> <p><i>Haemophysalis</i> spp.</p> <p><i>Rhipicephalus</i> spp.</p> <p><i>Amblyomma</i> sp.</p> <p><i>Ixodes</i> sp.</p>                                                 | <p>Human:</p> <p><i>Rickettsia honei</i></p> <p><i>Borrelia burgdorferi</i> and <i>B. mayonii</i> (Lyme disease)</p> <p>Cattle:</p> <p><i>Anaplasma marginale</i></p> <p><i>Babesia bovis</i></p> <p><i>Coxiella burnetii</i></p> <p><i>Theileria annulata</i></p> <p>Dogs:</p> <p><i>Anaplasma platys</i></p> <p><i>Babesia vogeli</i></p> <p><i>Babesia gibsoni</i></p>                                                                                                             |
| <b>Indonesia</b> | <i>Varanus komodoensis</i> :                                                                                                                                                                                                                                                                                                      | <i>Varanus komodoensis</i> :                                                                                                                                                                                                                                                                                                                                                                                                                                                          |

|                  |                                                                                                                                                                                                                                                                                                                                                                                 |                                                                                                                                                                                                                                                                                                                                                                                                                                                                                                                                                                                                                                                                                                                                         |
|------------------|---------------------------------------------------------------------------------------------------------------------------------------------------------------------------------------------------------------------------------------------------------------------------------------------------------------------------------------------------------------------------------|-----------------------------------------------------------------------------------------------------------------------------------------------------------------------------------------------------------------------------------------------------------------------------------------------------------------------------------------------------------------------------------------------------------------------------------------------------------------------------------------------------------------------------------------------------------------------------------------------------------------------------------------------------------------------------------------------------------------------------------------|
|                  | <i>Amblyomma robinsoni</i><br><i>Aponomma komodoense</i><br><br><i>Babirussa babirussa</i> :<br><i>Amblyomma babirussae</i><br><br><i>Varanus salvator</i> :<br><i>Amblyomma soembawensi</i><br><br>Livestock and Companion animals:<br><i>Rhipicephalus sanguineus</i> s.l.<br><i>Rhipicephalus microplus</i><br><i>Rhipicephalus pilans</i><br><i>Haemaphysalis bispinosa</i> | <i>Anaplasma</i> spp., <i>Rickettsia</i> spp., and <i>Borrelia</i> spp.<br><br>Livestock:<br><i>Babesia bigemina</i><br><i>Babesia bovis</i><br><i>Babesia naoakii</i><br><i>Theileria orientalis</i><br><i>Theileria</i> sp.<br><i>A. marginale</i><br><i>Coxiella burnetti</i><br><br>Companion animals:<br><i>Ehrlichia</i> sp.<br><i>Babesia</i> sp.<br><i>Anaplasma</i> sp.                                                                                                                                                                                                                                                                                                                                                        |
| <b>Turkey</b>    | <i>Hyalomma marginatum</i><br><i>Hyalomma excavatum</i><br><i>Hyalomma anatolicum</i><br><i>Hyalomma asiaticum</i><br><i>Hyalomma aegyptium</i><br><i>Rhipicephalus sanguineus</i> s.l.<br><i>Rhipicephalus turanicus</i><br><i>Rhipicephalus bursa</i><br><i>Haemaphysalis parva</i><br><i>Dermacentor marginatus</i><br><i>Ixodes ricinus</i>                                 | <i>Ehrlichia canis</i><br><i>Theileria</i> spp. ( <i>Theileria ovis</i> , <i>T. annulata</i> )<br><i>Anaplasma</i> spp. ( <i>A. marginale</i> , <i>A. phagocitophylum</i> ,<br><i>A. platys</i> , <i>A. ovis</i> , <i>A. centrale</i> , <i>A. bovis</i> )<br><i>Borrelia</i> spp. ( <i>B. burgdorferi</i> s.l., <i>B. turcica</i> )<br><i>Babesia</i> spp. ( <i>Babesia ovis</i> , <i>B. bovis</i> , <i>B. bigemina</i> ,<br><i>Babesia major</i> , <i>Babesia crassa</i> , <i>Babesia canis</i> and<br><i>B. divergens</i> )<br><i>Rickettsia</i> spp. ( <i>Rickettsia aeschlimannii</i> , <i>Rickettsia</i><br><i>hoogstraali</i> , <i>Rickettsia barbariae</i> )<br><i>Hepatozoon canis</i><br>Crimean-Congo Hemorrhagic fever virus |
| <b>Australia</b> | Mammalian:<br><i>Ixodes ornithorynchi</i> (platypus tick)<br><i>Amblyomma triguttatum</i> (ornate kangaroo tick)<br><br>Avian:                                                                                                                                                                                                                                                  | <b>New pathogens:</b><br><i>Borrelia taylori</i><br><i>Neoehrlichia australis</i><br><i>Neoehrlichia arcana</i><br><i>Midichloria mitochondrii</i>                                                                                                                                                                                                                                                                                                                                                                                                                                                                                                                                                                                      |

---

*Argas robertsi*

Reptilian:

*Amblyomma albolimbatum*

*Ixodes holocyclus*

*Amblyomma triguttatum*

*Haemaphysalis longicornis*

*Coxiella massiliensis*

hemotropic mycoplasmas

*Anaplasma* spp.

*Ehrlichia* spp.

*Rickettsia* spp.

*Francisella*

Rhabdoviruses

Chuviruses

Coltivurses

Flavivirus

Jingmenviruses

*Theileria* spp.

*Babesia* spp.

*Trypanosoma* spp.

*Hepatozoon* spp

Humans:

*Rickettsia australis* (Queensland spotted fever)

*Rickettsia honei* (Flinders Island spotted fever)

*Coxiella burnetii* (Q Fever)

Livestock and Companion animals:

*Anaplasma platys*

*A. marginale*

*Babesia bovis*

*B. bigemina*

*B. vogeli*

*Borrelia persica*

*T. orientalis* complex

*H. canis*

*E. canis*

---
